# Supplementary material for: Effects of Additional Protein Intake on Lean Body Mass in Patients Undergoing Multimodal Treatment for Morbid Obesity
Source: MDPI journal article supplement (doi:10.3390/nu16060864), 2024-03-16
Supplement: s1 [file s1]

# Supplementary Materials

**Table S1.** Results of subgroup analyses.

|                                                   |              | LBM <sup>a</sup> [kg] t0 |      |      | LBM [kg] t1 |      |      | Diff.         | <i>p</i> -value (time) <sup>b</sup> | <i>p</i> -value (time x group) <sup>c</sup> |
|---------------------------------------------------|--------------|--------------------------|------|------|-------------|------|------|---------------|-------------------------------------|---------------------------------------------|
| Subgroup                                          |              | Mean (SD)                | Min. | Max. | Mean (SD)   | Min. | Max. |               |                                     |                                             |
| Men                                               | CG (n = 47)  | 91.0 (14.4)              | 57.9 | 132  | 82.4 (13.9) | 53.0 | 130  | 8.64 (9.49 %) | < 0.001                             | 0.233                                       |
|                                                   | PG (n = 35)  | 91.6 (15.0)              | 38.6 | 119  | 81.5 (12.6) | 36.5 | 109  | 10.1 (11.0 %) |                                     |                                             |
| Women                                             | CG (n = 101) | 61.4 (8.86)              | 33.1 | 90.4 | 57.1 (7.33) | 43.1 | 86.1 | 4.30 (7.00 %) | < 0.001                             | 0.555                                       |
|                                                   | PG (n = 84)  | 60.7 (7.04)              | 43.9 | 86.3 | 56.7 (6.42) | 40.1 | 79.0 | 3.99 (6.57 %) |                                     |                                             |
| Older patients (age ≥56 years) <sup>d</sup>       | CG (n = 39)  | 68.0 (15.2)              | 51.1 | 107  | 62.5 (12.9) | 47.0 | 101  | 5.54 (8.15 %) | < 0.001                             | 0.552                                       |
|                                                   | PG (n = 30)  | 68.9 (14.6)              | 52.5 | 103  | 62.7 (12.0) | 48.7 | 90.5 | 6.16 (8.94 %) |                                     |                                             |
| Taller patients (height ≥1.74m) <sup>d</sup>      | CG (n = 35)  | 91.6 (15.6)              | 61.1 | 132  | 82.7 (14.6) | 56.0 | 130  | 8.92 (7.00 %) | < 0.001                             | 0.577                                       |
|                                                   | PG (n = 33)  | 85.5 (15.9)              | 56.5 | 115  | 77.4 (12.1) | 54.6 | 102  | 8.13 (7.00 %) |                                     |                                             |
| Higher BMI (≥51.6kg/m <sup>2</sup> ) <sup>d</sup> | CG (n = 40)  | 78.2 (19.9)              | 33.1 | 132  | 72.0 (16.7) | 52.9 | 119  | 6.28 (8.03 %) | < 0.001                             | 0.485                                       |
|                                                   | PG (n = 27)  | 79.4 (19.3)              | 54.6 | 119  | 72.0 (16.1) | 51.3 | 109  | 7.39 (9.30 %) |                                     |                                             |
| Lower LBM (≤57.7kg) <sup>e</sup>                  | CG (n = 37)  | 53.4 (4.01)              | 33.1 | 57.2 | 51.2 (3.47) | 43.1 | 63.2 | 2.22 (4.15 %) | < 0.001                             | 0.598                                       |
|                                                   | PG (n = 30)  | 53.3 (4.27)              | 38.6 | 57.7 | 50.5 (4.69) | 36.5 | 59.1 | 2.80 (5.26 %) |                                     |                                             |
| Higher LBM (≥83.0kg) <sup>d</sup>                 | CG (n = 40)  | 95.3 (11.7)              | 83.9 | 132  | 85.8 (12.5) | 68.5 | 130  | 9.44 (9.91 %) | < 0.001                             | 0.163                                       |
|                                                   | PG (n = 27)  | 97.0 (10.5)              | 83.0 | 119  | 85.7 (9.10) | 67.6 | 109  | 11.3 (11.6 %) |                                     |                                             |
| With gastric balloon                              | CG (n = 92)  | 68.3 (17.5)              | 33.1 | 132  | 63.3 (15.5) | 43.1 | 130  | 5.02 (7.32 %) | < 0.001                             | 0.523                                       |
|                                                   | PG (n = 65)  | 71.2 (18.5)              | 43.9 | 119  | 65.7 (15.4) | 40.1 | 109  | 5.55 (7.72 %) |                                     |                                             |
| Without gastric balloon                           | CG (n = 56)  | 75.0 (17.0)              | 52.0 | 128  | 68.3 (14.7) | 47.2 | 119  | 6.77 (8.93 %) | < 0.001                             | 0.416                                       |
|                                                   | PG (n = 54)  | 68.1 (15.8)              | 38.6 | 108  | 62.0 (12.6) | 36.5 | 92.8 | 6.07 (8.96 %) |                                     |                                             |
| Combined subgroup <sup>f</sup>                    | CG (n = 95)  | 68.2 (16.2)              | 33.1 | 128  | 63.0 (13.7) | 43.1 | 119  | 5.28 (7.73 %) | < 0.001                             | 0.830                                       |
|                                                   | PG (n = 95)  | 67.4 (15.6)              | 43.9 | 119  | 62.2 (13.2) | 40.1 | 109  | 5.14 (5.28 %) |                                     |                                             |

a: Lean body mass; b: differences between t0 at baseline and t1 at 12 weeks; c: differences between control group (CG) and protein group (PG); d: subgroup was formed based on a 75<sup>th</sup> percentile cutoff; e: subgroup was formed based on a 25<sup>th</sup> percentile cutoff; f: Combined group consisted of 95 case-control pairs that were individually matched for sex, age (±3 years) and height (±0.05m). Differences were tested by using the two-factor ANOVA with repeated measures.
